# Supplementary material for: Preclinical drug screen reveals topotecan, actinomycin D, and volasertib as potential new therapeutic candidates for ETMR brain tumor patients
Source: Oxford University Press journal article supplement (doi:10.1093/neuonc/nox093), 2017-05-03
Supplement: nox093_suppl_supplementary_material_table1.docx [file nox093_suppl_supplementary_material_table1.docx]

**Supplementary Material Table 1.**

**Supplementary Material Table 1.** List of primary antibodies with their respective supplier and catalog number.

| **Antibody** | **Catalog No.** | **Supplier** |
| --- | --- | --- |
| Anti-4E-BP1, rabbit | 9452 | Cell Signaling Technology, Danvers, USA |
| Anti-Phospho-4E-BP1, rabbit | 2855 | Cell Signaling Technology, Danvers, USA |
| Anti-Aurora A, rabbit | 14475 | Cell Signaling Technology, Danvers, USA |
| Anti-Phospho-Aurora A, rabbit | 3079 | Cell Signaling Technology, Danvers, USA |
| Anti-GAPDH, mouse | CB1001 | Merck Millipore, Darmstadt, Germany |
| Anti-Histone H2A.X, rabbit | 7631 | Cell Signaling Technology, Danvers, USA |
| Anti-N-Myc, mouse | OP13 | Merck Millipore, Darmstadt, Germany |
| Anit-Phospho-Histone H2A.X, rabbit | 9718 | Cell Signaling Technology, Danvers, USA |
| Anti-PARP, rabbit | 9542 | Cell Signaling Technology, Danvers, USA | |
| Anti-PLK1, rabbit | 4535 | Cell Signaling Technology, Danvers, USA | |
| Anti-PLK2, rabbit | ab154794 | Abcam, Cambridge, UK | |
| Anti-PLK3, rabbit | 4896 | Cell Signaling Technology, Danvers, USA | |
| Anti-Topoisomerase I, rabbit | ab85038 | Abcam, Cambridge, UK | |
