# Supplementary material for: Preclinical drug screen reveals topotecan, actinomycin D, and volasertib as potential new therapeutic candidates for ETMR brain tumor patients
Source: Oxford University Press journal article supplement (doi:10.1093/neuonc/nox093), 2017-05-03
Supplement: nox093_suppl_supplementary_material_table2.docx [file nox093_suppl_supplementary_material_table2.docx]

**Supplementary Material Table 2.**

**Supplementary Material Table 2.** List of secondary antibodies with their respective supplier and catalog number.

| **Antibody** | **Catalog No.** | **Supplier** |
| --- | --- | --- |
| Anti-mouse, IgG-HRP, goat | sc-2005 | Santa Cruz Biotech, Heidelberg, Germany | |
| Anti-rabbit IgG-HRP, goat | sc-2054 | Santa Cruz Biotech, Heidelberg, Germany | |
