# Supplementary material for: Preclinical drug screen reveals topotecan, actinomycin D, and volasertib as potential new therapeutic candidates for ETMR brain tumor patients
Source: Oxford University Press journal article supplement (doi:10.1093/neuonc/nox093), 2017-05-03
Supplement: nox093_suppl_supplementary_table1.docx [file nox093_suppl_supplementary_table1.docx]

**Supplementary Table 1.**

**Supplementary Table 1. List of 35 compounds used in the drug screen in BT183 cells.** Compound name, target, supplier and solvent for *in vitro* drug screens are listed.Compounds are grouped by their target (middle column) and highlighted in different colors for a better overview.

| **Number** | **Compound** | **Target** | **Supplier** | **Solvent** |
| --- | --- | --- | --- | --- |
| 1 | Topotecan | Topoisomerase I | ApexBio | DMSO |
| 2 | Irinotecan | Topoisomerase I | SelleckChem | DMSO |
| 3 | SN-38 | Topoisomerase I *(metabolite of Irinotecan)* | AdooQ | DMSO |
| 4 | Doxorubicin | Topoisomerase II | SelleckChem | DMSO |
| 5 | Etoposide | Topoisomerase II | MedChemExpress | DMSO |
| 6 | Daunorubicin | Topoisomerase II | SelleckChem | DMSO |
| 7 | MLN0128 | mTor | SelleckChem | DMSO |
| 8 | Rapamycin | mTor | SelleckChem | DMSO |
| 9 | Everolimus | mTor (mTorc1 complex) | SelleckChem | DMSO |
| 10 | Alisertib | Aurora A kinase | SelleckChem | DMSO |
| 11 | Nanaomycin A | Dnmt3b | AdooQ | DMSO |
| 12 | Decitabine | DNA Methyltransferase | Abcam | DMSO |
| 13 | 5-azacytidine | DNA Methyltransferase | ApexBio | DMSO |
| 14 | Panobinostat | pan-HDAC | SelleckChem | DMSO |
| 15 | Vorinostat | pan-HDAC | SelleckChem | DMSO |
| 16 | GSK343 | Ezh2 | ApexBio | DMSO |
| 17 | EPZ-6438 | Ezh2 | ApexBio | DMSO |
| 18 | Thiotepa | Alkylating DNA | ApexBio | DMSO |
| 19 | Ifosfamide | Alkylating DNA | SelleckChem | DMSO |
| 20 | Cyclophosphamide | Alkylating DNA | SelleckChem | DMSO |
| 21 | Temozolomide | Alkylating DNA | SelleckChem | DMSO |
| 22 | Volasertib | Plk1 | AdooQ | DMSO |
| 23 | Vincristine | Tubulin (methaphase blockage) | SelleckChem | DMSO |
| 24 | Actinomycin D | DNA transcription | ApexBio | DMSO |
| 25 | JQ1 | Brd4 | Cayman Chemical | DMSO |
| 26 | I-BET-762 | Brd2-4 | ApexBio | DMSO |
| 27 | THZ1 | Cdk7 | ApexBio | DMSO |
| 28 | Carboplatin | DNA synthesis and repair | ApexBio | 5% glucose/H20 |
| 29 | Cisplatin | DNA synthesis and repair | MedChemExpress | H2O |
| 30 | Vismodegib | Smoothened (Hedgehog pathway) | SelleckChem | DMSO |
| 31 | Arsenic trioxide | Gli1/2 (SHH pathway), Glycolosis and cell metabolism | Sigma | 1 M NaOH |
| 32 | MK-0752 | ɣ-secretase (Notch pathway) | AdooQ | DMSO |
| 33 | Sorafenib | RTK and TK (RAF, VEGFR) | ApexBio | DMSO |
| 34 | Bortezomib | 26S proteasome | SelleckChem | DMSO |
| 35 | Methotrexate | Dihydrofolate reductase (Tetrahydrofolate synthesis) | SelleckChem | DMSO |
