# Supplementary material for: Preclinical drug screen reveals topotecan, actinomycin D, and volasertib as potential new therapeutic candidates for ETMR brain tumor patients
Source: Oxford University Press journal article supplement (doi:10.1093/neuonc/nox093), 2017-05-03
Supplement: nox093_suppl_supplementary_table2.docx [file nox093_suppl_supplementary_table2.docx]

**Supplementary Table 2.**

**Supplementary Table 2. List of tested drug combinations and their synergistic effect in BT183 cells.** All 27 drug combination are listed (sorted by ‘Drug A’) and synergistic effect is indicated with x (right column). No synergistic effect is indicated with - .

| Number | Drug A | Drug B | Synergy |
| --- | --- | --- | --- |
| 1 | Topotecan | Decitabine | **x** |
| 2 | Topotecan | Alisertib | - |
| 3 | Topotecan | MLN0128 | - |
| 4 | Topotecan | Methotrexate | - |
| 5 | Topotecan | Vincristine | - |
| 6 | Topotecan | Volasertib | - |
| 7 | Topotecan | Panobinostat | - |
| 8 | Topotecan | Actinomycin D | **x** |
| 9 | Volasertib | Actinomycin D | - |
| 10 | Volasertib | Alisertib | - |
| 11 | Volasertib | Doxorubicin | - |
| 12 | Volasertib | Decitabine | - |
| 13 | Volasertib | Panobinostat | - |
| 14 | Doxorubicin | Methotrexate | - |
| 15 | Doxorubicin | Vincristine | - |
| 16 | Doxorubicin | MLN0128 | - |
| 17 | Doxorubicin | Decitabine | - |
| 18 | Doxorubicin | Alisertib | - |
| 19 | Panobinostat | Alisertib | - |
| 20 | Panobinostat | Volasertib | - |
| 21 | Panobinostat | Decitabine | - |
| 22 | Panobinostat | MLN0128 | - |
| 23 | Alisertib | Volasertib | - |
| 24 | Decitabine | Alisertib | - |
| 25 | Decitabine | Volasertib | - |
| 26 | Decitabine | MLN0128 | - |
| 27 | Vincristine | Methotrexate | - |
